# Supplementary material
Source: PubMed Central journal article supplement (PMC7778787)

**A**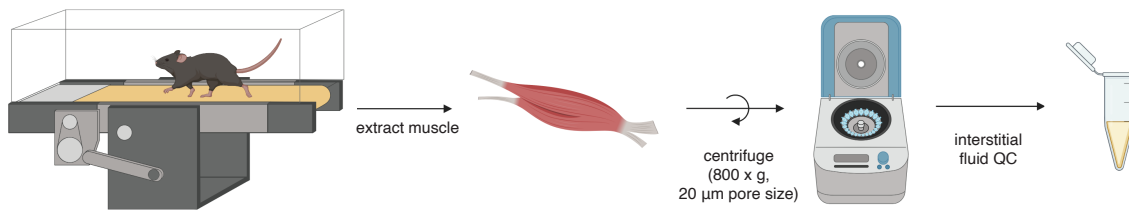**B**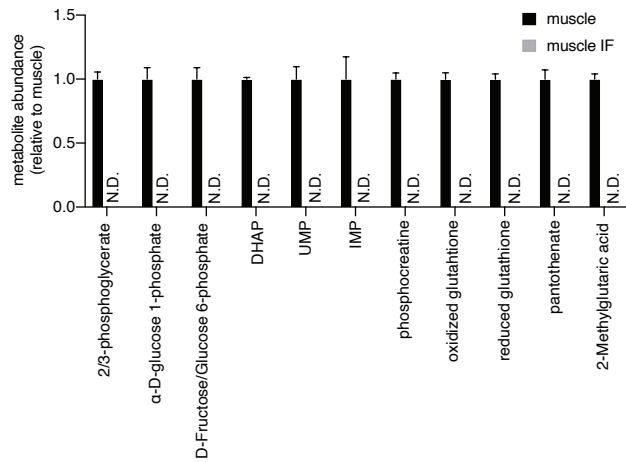**C**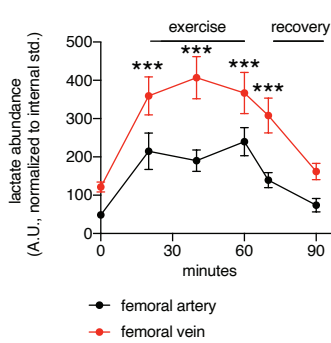**D**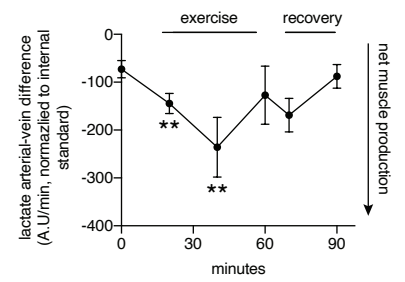**E**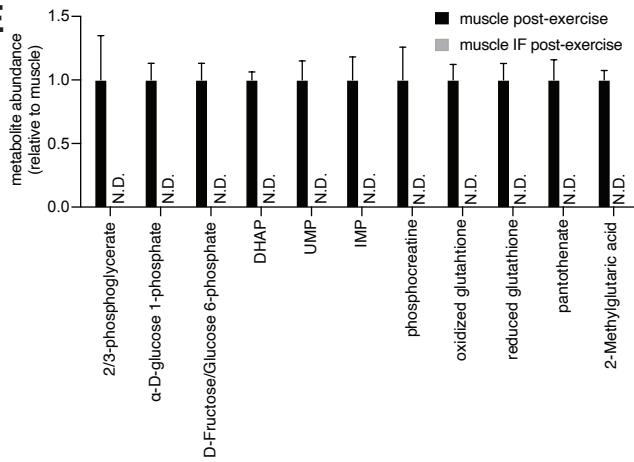**F**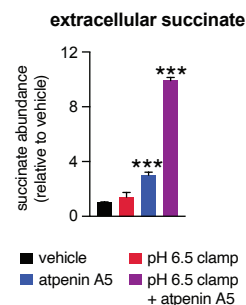**G**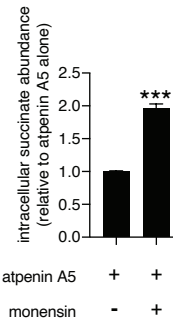**H**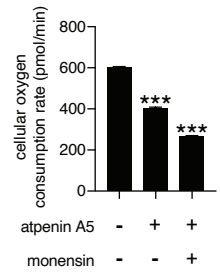**I**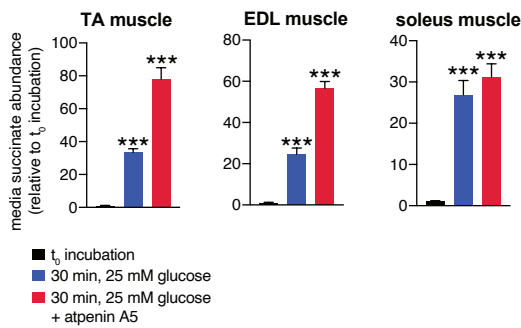

Supplement: NIHMS1624430-supplement-1.pdf [file NIHMS1624430-supplement-1.pdf]

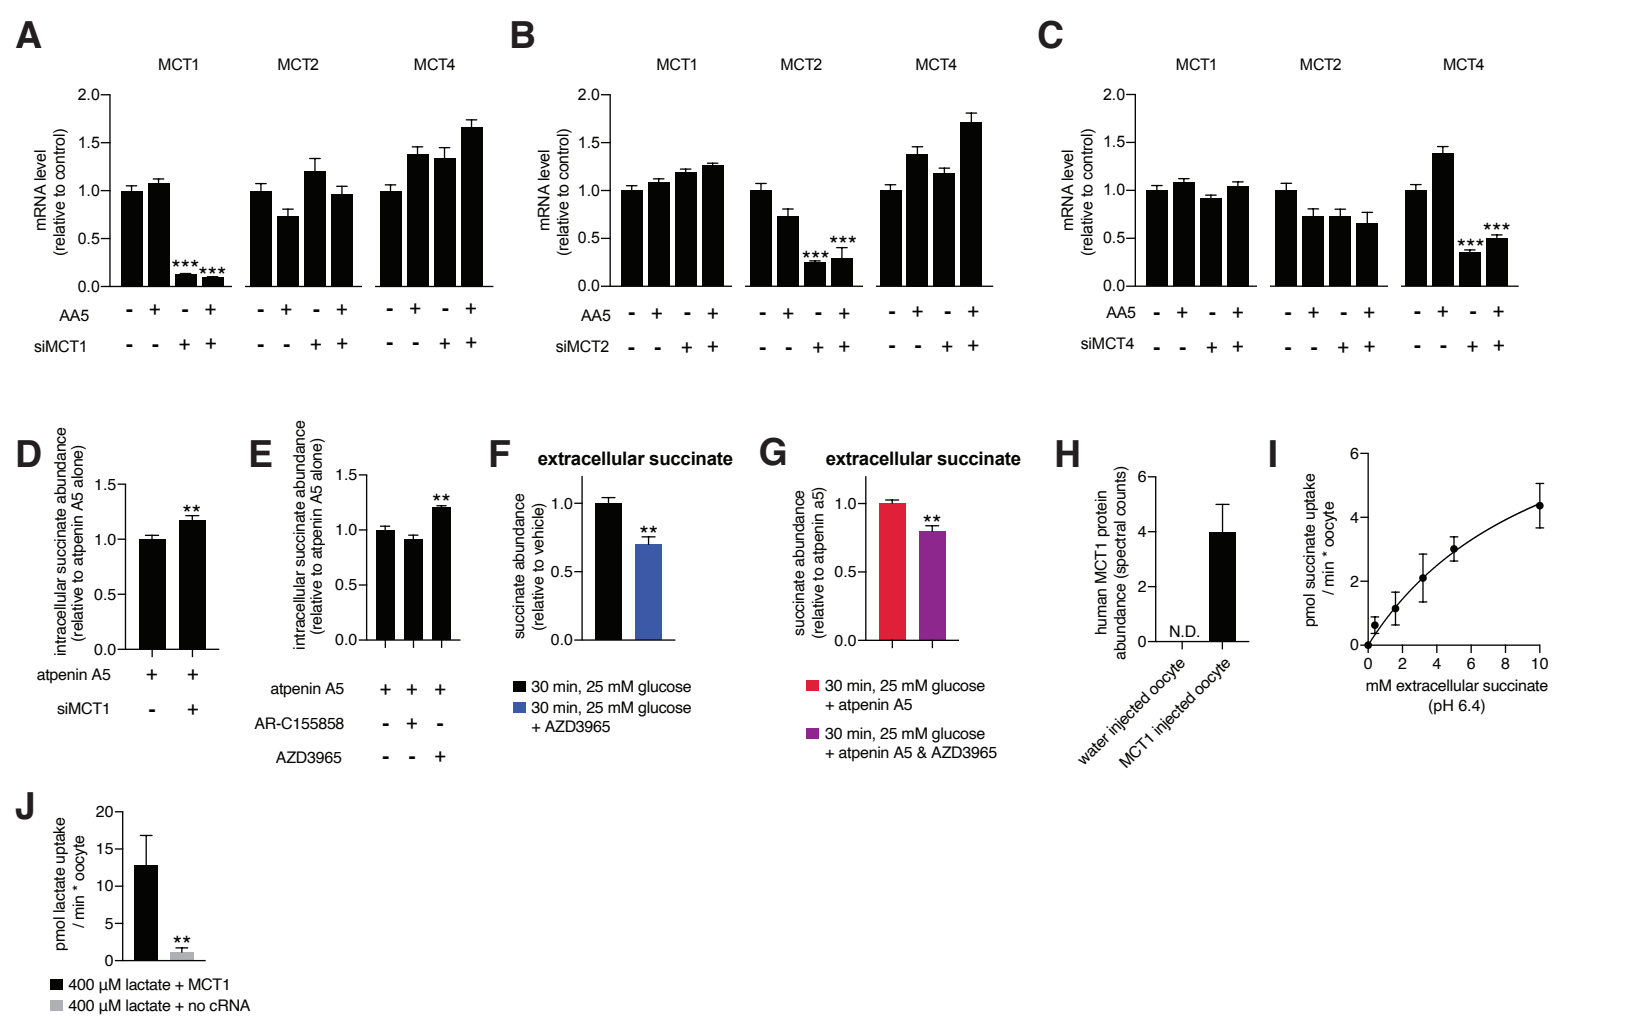

Supplement: NIHMS1624430-supplement-2.pdf [file NIHMS1624430-supplement-2.pdf]

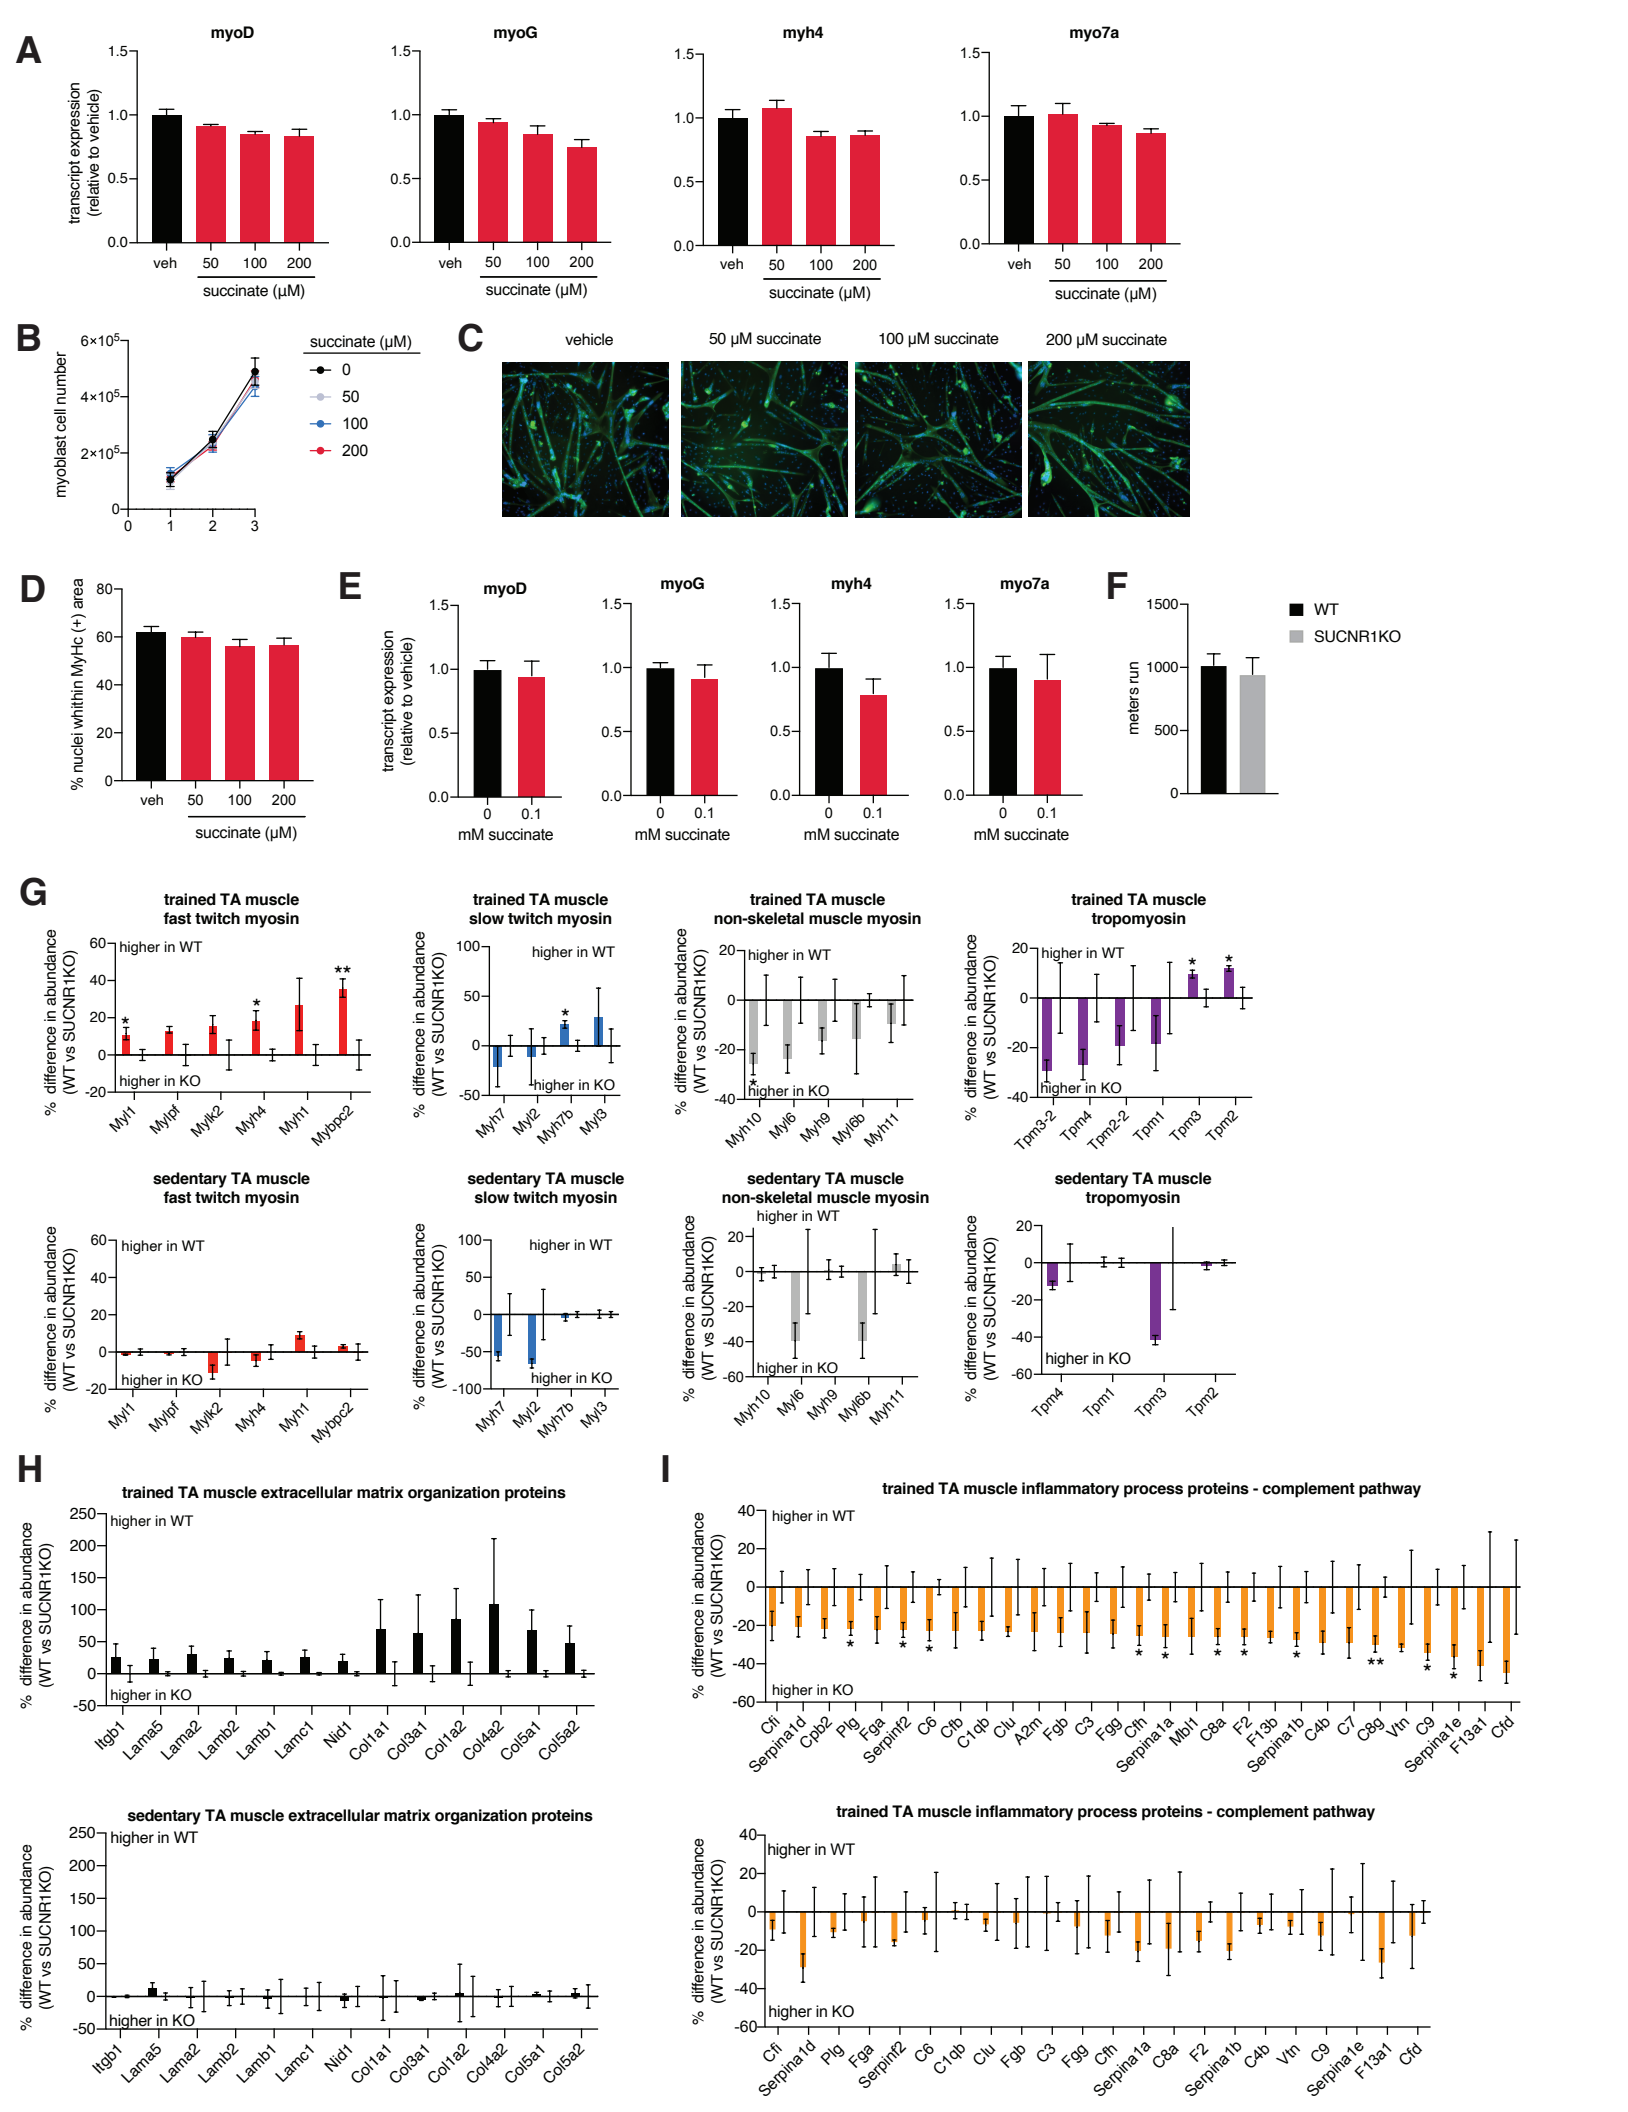

Supplement: NIHMS1624430-supplement-3.pdf [file NIHMS1624430-supplement-3.pdf]
